# Supplementary material for: Electroactive properties and piezo-tribo hybrid energy harvesting performances of PVDF-AlFeO3 composites: role of crystal symmetry and agglomeration of fillers
Source: Royal Society of Chemistry journal article supplement (doi:10.1039/d3dt02547k), 2023-01-01
Supplement: d3dt02547k1.pdf [file d3dt02547k1.pdf]

**Electronic Supplementary Information (ESI)**

**Electroactive properties and piezo-tribo hybrid energy harvesting performances of  
PVDF-AlFeO<sub>3</sub> composites: Role of crystal symmetry and agglomeration of fillers**

Abhishek Sasmal<sup>a,b</sup>, Sourav Maity<sup>a</sup>, A. Arockiarajan<sup>b,c</sup>, Shrabanee Sen<sup>\*a</sup>

<sup>a</sup>Functional Materials and Devices Division, CSIR-Central Glass & Ceramic Research  
Institute, Kolkata – 700032, India

<sup>b</sup>Department of Applied Mechanics, Indian Institute of Technology Madras, Chennai – 600036,  
India

<sup>c</sup>Centre of Excellence in Ceramics Technologies for Futuristic Mobility, Indian Institute of  
Technology Madras (IIT Madras), Chennai, Tamil Nadu - 600036, India

\*E-mail ID: [shrabanee@cgcri.res.in](mailto:shrabanee@cgcri.res.in)

**Fig. S1**

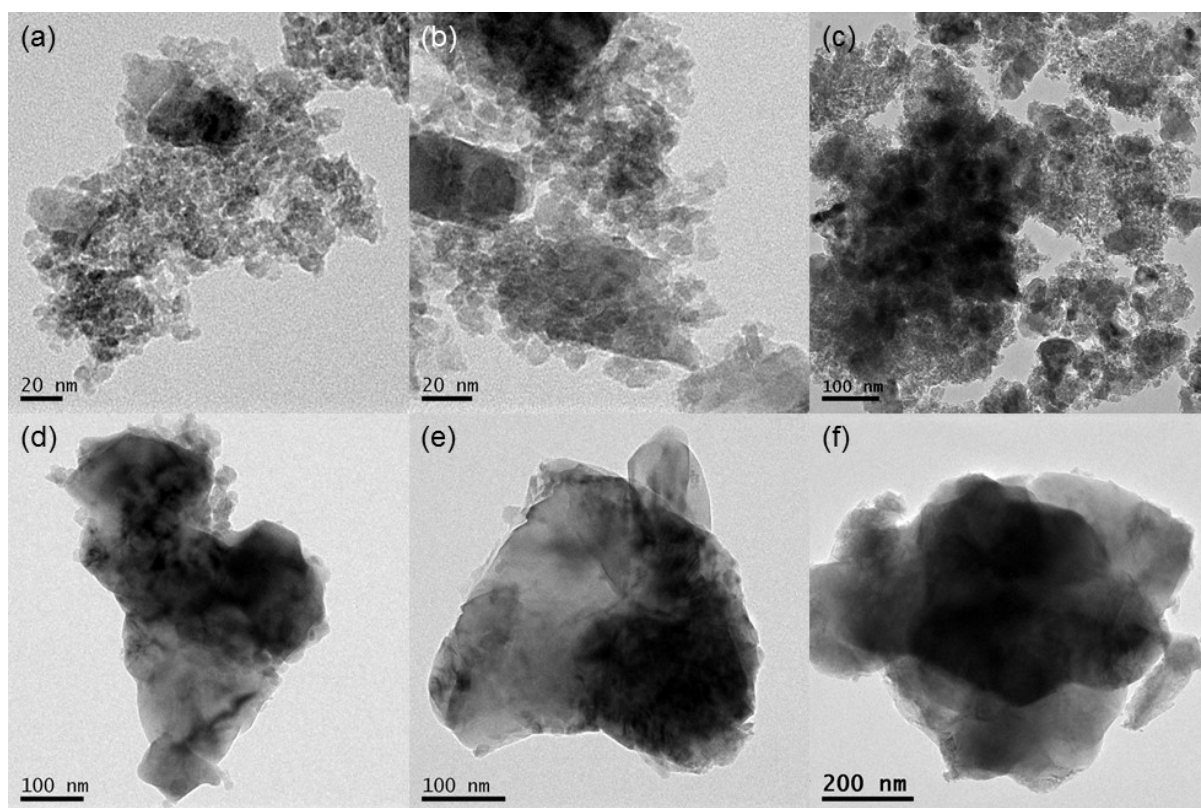

**Fig. S1.** Bright field TEM images of (a-c) AFRH and (d-f) AFOR particles taken at different portions of the TEM grid.

**Fig. S2**

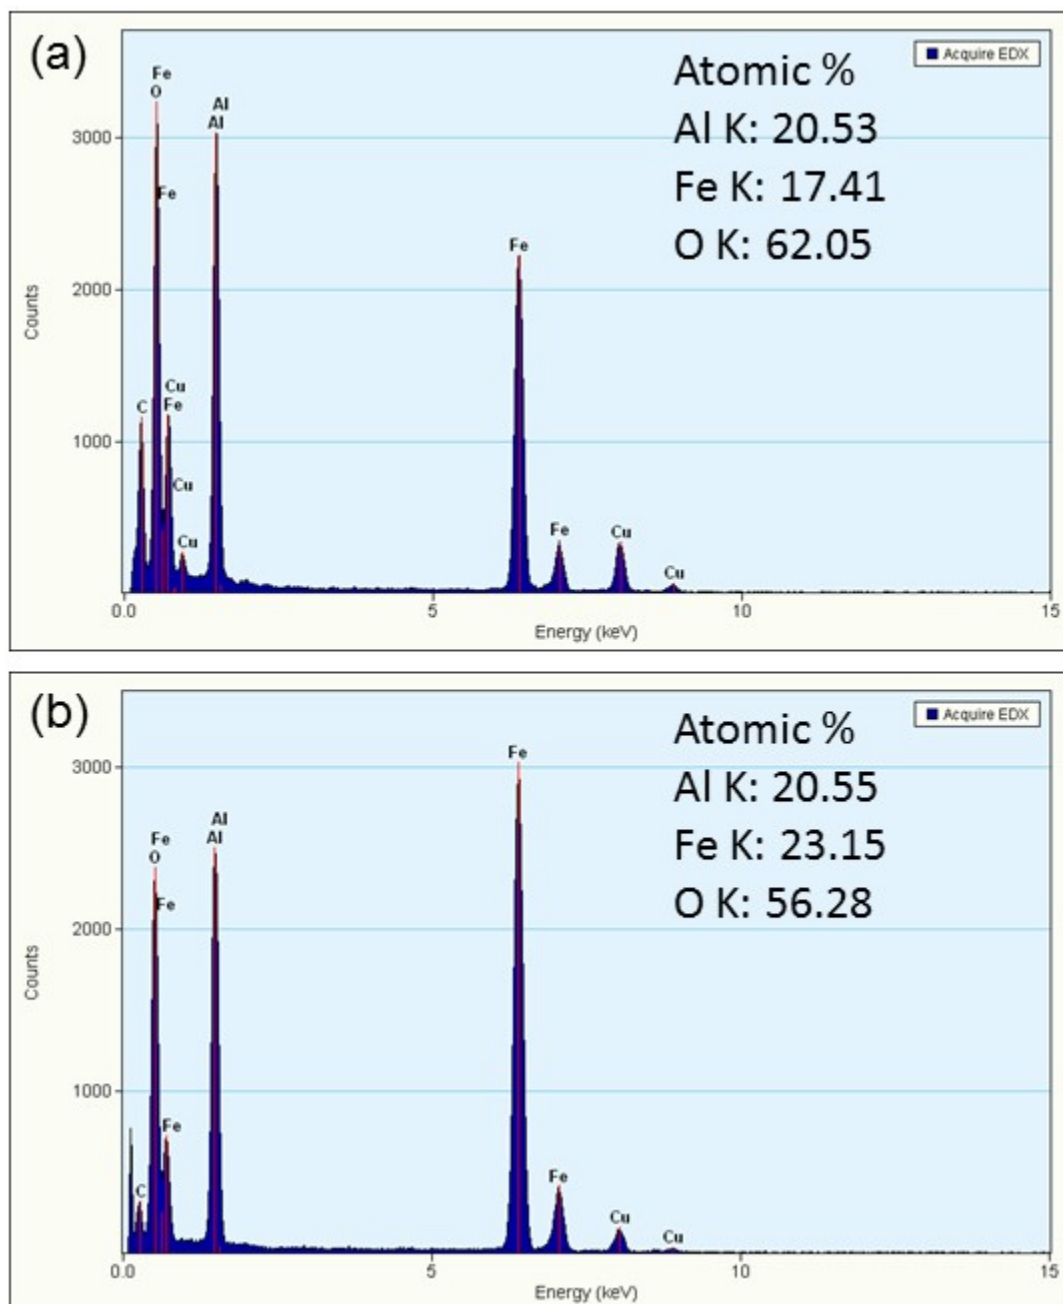

**Fig. S2.** EDX spectrum of (a) AFRH and (b) AFOR samples.

**Fig. S3**

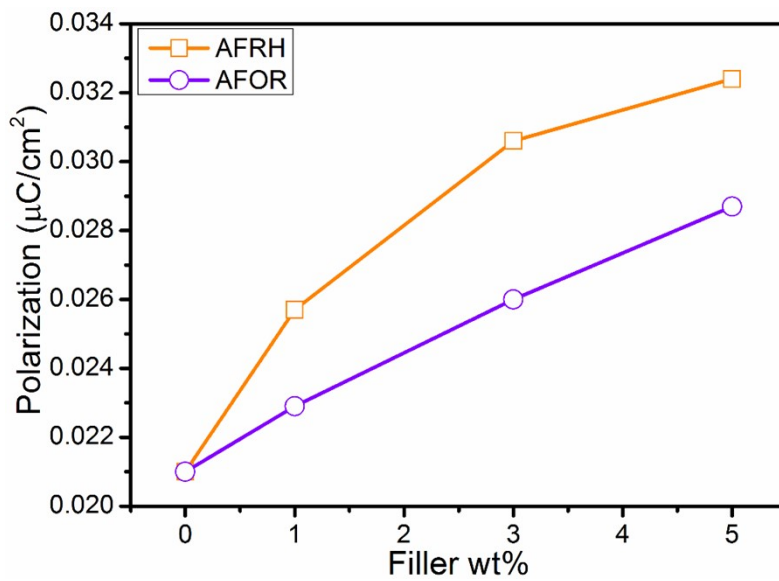

**Fig. S3.** Maximum polarization of all the composite films measured at  $\sim 25$  kV/cm of an applied field.

**Fig. S4**

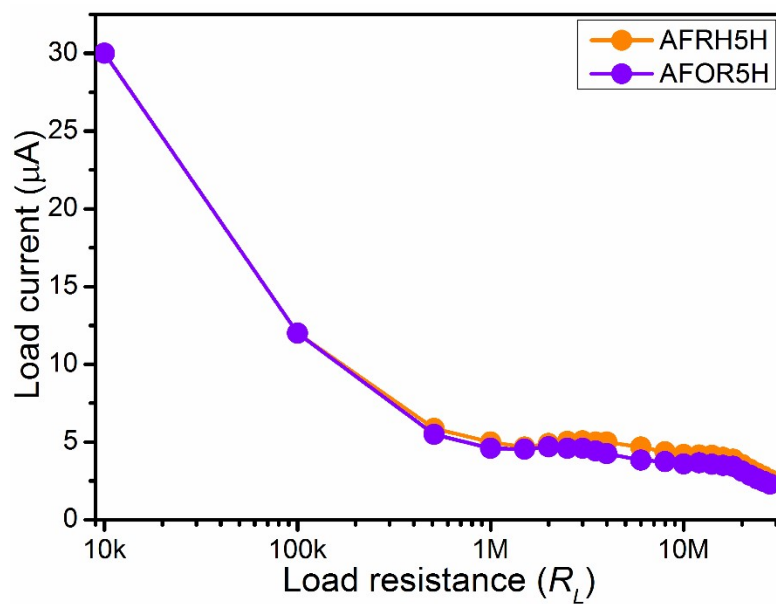

**Fig. S4.** Load resistance ( $R_L$ ) dependent load current ( $I_L$ ) from the AFRH5H and AFOR5H devices.
